# Supplementary material for: Morphology and hygroscopicity of nanoplastics in sea spray
Source: Royal Society of Chemistry journal article supplement (doi:10.1039/d3cp03793b), 2023-01-01
Supplement: d3cp03793b1.pdf [file d3cp03793b1.pdf]

## Supporting Information:

# Morphology and hygroscopicity of nanoplastics in sea spray

Sarah Suda Petters,<sup>a,†</sup> Eva Rosendal Kjærgaard,<sup>a</sup> Freja Hasager,<sup>a</sup> Andreas  
Massling,<sup>b</sup> Marianne Glasius,<sup>a</sup> Merete Bilde<sup>a</sup>

<sup>a</sup> Department of Chemistry, Aarhus University, Langelandsgade 140, 8000 Aarhus C, Denmark. Merete Bilde <bilde@chem.au.dk>

<sup>b</sup> Department of Environmental Science, Aarhus University, Frederiksborgvej 399, 4000 Roskilde, Denmark.

<sup>†</sup> Present address: Bourns College of Engineering Center for Environmental Research and Technology, University of California Riverside, 1084 Columbia Ave, Riverside, CA 92507. Sarah Suda Petters <sarah.petters@ucr.edu>

### Contents

|                                                                                    |    |
|------------------------------------------------------------------------------------|----|
| Section S1. Experiment List .....                                                  | 2  |
| Section S2. Instrumentation .....                                                  | 6  |
| S2.1. AMS Mass Resolution .....                                                    | 6  |
| S2.2. AMS Vaporizer Characterization.....                                          | 6  |
| S2.3. HTDMA Inversion.....                                                         | 8  |
| Section S3. AMS data analysis .....                                                | 8  |
| S3.1. Mass calibration .....                                                       | 8  |
| S3.2. Air beam.....                                                                | 9  |
| S3.3. Background subtraction .....                                                 | 9  |
| S3.4. Peak shape factor .....                                                      | 9  |
| S3.5. Preparation for high-resolution fitting .....                                | 10 |
| S3.6. Fitting a Gaussian curve to peaks in the high-resolution mass spectrum ..... | 10 |
| S3.7. Ions of interest.....                                                        | 11 |
| S3.8. Particle Time-of-Flight Measurement.....                                     | 11 |
| S3.9. Timeseries and signal-to-noise.....                                          | 11 |
| Section S4. Ionization Efficiency .....                                            | 13 |
| S4.1. Nitrate.....                                                                 | 13 |
| S4.2. Chloride.....                                                                | 14 |
| S4.3. Polystyrene.....                                                             | 16 |
| Section S5. Supplement to the Results .....                                        | 16 |
| S5.1. Enhancement of Separation After Hygroscopic Growth .....                     | 16 |
| S5.2. Growth Factors.....                                                          | 17 |
| References.....                                                                    | 17 |

## Section S1. Experiment List

Table S1 (over the next pages) details the experiments performed.

**Table S1.** Experiment list. Experiment numbers (**Exp #**) are referenced in the captions of Figure 3, Figure 4, and Figure 7. Solution numbers (**Soln #**) identify the aerosolized mixture (Table 1 of the main text). Three configurations of the instrument described in the main text are reported in the **Type** column: HTDMA, SEMS, and HTDMA-AMS. Dry diameter (**D<sub>dry</sub>**) is scanned in SEMS mode and held constant in HTDMA and HTDMA-AMS modes. **Wet RH** refers to the relative humidity in the HTDMA (DMA 2 in Figure 1). The number of seconds per bin (**s/bin**) and the number of bins (**Bins**) are multiplied together to give the total scan time (**Scan**) in either the SEMS or the HTDMA instrument. **c<sub>tot</sub>** is the total number concentration reported by the SEMS or HTDMA instrument software, and **m<sub>tot</sub>** is the total mass concentration reported by the SEMS software. Table S10 shows the results of growth factor inversion calculations for select experiments listed here.

| Exp # | Soln # | Salinity<br>g kg <sup>-1</sup> | PSL<br>mg kg <sup>-1</sup> | Type  | D <sub>dry</sub><br>nm | DMA 1 Q <sub>sh</sub> / Q <sub>sa</sub><br>L min <sup>-1</sup> | Dry RH<br>% | D <sub>wet</sub><br>nm | DMA 2 Q <sub>sh</sub> / Q <sub>sa</sub><br>L min <sup>-1</sup> | Wet RH<br>% | Date<br>mmm | Date<br>dd(#) | Time<br>hh:mm | s/bin<br>s | Bins<br>- | Scan<br>s | c <sub>tot</sub><br>cm <sup>-3</sup> | m <sub>tot</sub><br>μg m <sup>-3</sup> |
|-------|--------|--------------------------------|----------------------------|-------|------------------------|----------------------------------------------------------------|-------------|------------------------|----------------------------------------------------------------|-------------|-------------|---------------|---------------|------------|-----------|-----------|--------------------------------------|----------------------------------------|
| 1     | MilliQ | 0                              | 0                          | HTDMA | 150                    | 5.00 / 0.965                                                   | 3.7         | 75-500                 | 5.00 / 0.508                                                   | 75          | Feb         | 11a           | 11:51-12:14   | 1          | 60        | 60        | 5.8                                  |                                        |
| 2     | 8      | 0                              | 0.18                       | HTDMA | 150                    | 5.00 / 0.977                                                   | 3.9         | 75-500                 | 5.00 / 0.509                                                   | 75          | Feb         | 11b           | 12:18-12:41   | 2          | 60        | 120       | 219.2                                |                                        |
| 3     | 7      | 7.52e-5                        | 0.18                       | HTDMA | 150                    | 5.00 / 0.979                                                   | 3.9         | 75-500                 | 5.01 / 0.507                                                   | 75          | Feb         | 11c           | 12:51-13:30   | 2          | 60        | 120       | 242.6                                |                                        |
| 4     | 6      | 4.96e-4                        | 0.18                       | HTDMA | 150                    | 5.00 / 0.992                                                   | 4           | 75-500                 | 5.00 / 0.514                                                   | 74.9        | Feb         | 11d           | 13:32-13:53   | 2          | 60        | 120       | 296.2                                |                                        |
| 5     | 6      | 4.96e-4                        | 0.18                       | SEMS  | 5-600                  | 5.00 / 0.992                                                   | 4.2         |                        |                                                                |             | Feb         | 11-s1         | 14:00-14:06   | 1          | 60        | 60        | 163505                               | 2.8                                    |
| 6     | 5      | 3.27e-3                        | 0.18                       | SEMS  | 5-1000                 | 5.00 / 1.000                                                   | 4           |                        |                                                                |             | Feb         | 11-s2         | 14:08-14:11   | 3          | 60        | 180       | 387555                               | 28.2                                   |
| 7     | 5      | 3.27e-3                        | 0.18                       | SEMS  | 5-1000                 | 3.00 / 0.596                                                   | 3.7         |                        |                                                                |             | Feb         | 11-s3         | 14:19-14:30   | 3          | 60        | 180       | 290553                               | 11.4                                   |
| 8     | 5      | 3.27e-3                        | 0.18                       | HTDMA | 150                    | 5.00 / 1.016                                                   | 4           | 75-500                 | 5.00 / 0.521                                                   | 74.9        | Feb         | 11e           | 14:31-14:33   | 2          | 60        | 120       | 370                                  |                                        |
| 9     | 4      | 0.022                          | 0.18                       | HTDMA | 150                    | 5.00 / 1.002                                                   | 4.2         | 75-500                 | 5.00 / 0.522                                                   | 75          | Feb         | 11f           | 14:36-14:50   | 2          | 60        | 120       | 511.3                                |                                        |
| 10    | 4      | 0.022                          | 0.18                       | SEMS  | 5-1000                 | 3.00 / 0.597                                                   | 3.8         |                        |                                                                |             | Feb         | 11-s4         | 14:53-15:00   | 3          | 60        | 180       | 878619                               | 39                                     |
| 11    | 3      | 0.14                           | 0.18                       | HTDMA | 150                    | 5.00 / 1.010                                                   | 4.2         | 75-500                 | 5.00 / 0.523                                                   | 75          | Feb         | 11g           | 15:04-15:11   | 2          | 60        | 120       | 9170.4                               |                                        |
| 12    | 3      | 0.14                           | 0.18                       | SEMS  | 5-1000                 | 3.00 / 0.592                                                   | 3.8         |                        |                                                                |             | Feb         | 11-s5         | 15:13-15:20   | 3          | 60        | 180       | 2193940                              | 238.5                                  |
| 13    | 2      | 0.94                           | 0.18                       | SEMS  | 5-1000                 | 3.00 / 0.599                                                   | 3.6         |                        |                                                                |             | Feb         | 11-s6         | 15:25-15:32   | 3          | 60        | 180       | 3845974                              | 1474                                   |
| 14    | 2      | 0.94                           | 0.18                       | HTDMA | 150                    | 5.00 / 1.006                                                   | 4.4         | 75-500                 | 5.00 / 0.514                                                   | 74.9        | Feb         | 11h           | 15:33-15:40   | 2          | 60        | 120       | 87195.2                              |                                        |
| 15    | 1      | 6.21                           | 0.18                       | HTDMA | 150                    | 5.00 / 1.007                                                   | 4.4         | 75-500                 | 5.00 / 0.514                                                   | 74.8        | Feb         | 11i           | 15:44-15:49   | 2          | 60        | 120       | 383259                               |                                        |
| 16    | 1      | 6.21                           | 0.18                       | SEMS  | 5-1000                 | 3.00 / 0.591                                                   | 3.9         |                        |                                                                |             | Feb         | 11-s7         | 15:50-15:53   | 3          | 60        | 180       | 4886690                              | 8219.9                                 |
| 17    | MilliQ | 0                              | 0                          | SEMS  | 5-1000                 | 3.00 / 0.577                                                   | 2.7         |                        |                                                                |             | Feb         | 14-s1         | 11:08-11:18   | 3          | 60        | 180       | 64434                                | 4                                      |
| 18    | MilliQ | 0                              | 0                          | HTDMA | 150                    | 5.00 / 0.913                                                   | 3.8         | 75-500                 | 5.00 / 0.520                                                   | 75.2        | Feb         | 14a           | 11:30-11:34   | 2          | 60        | 120       | 3.1                                  |                                        |
| 19    | 8      | 0                              | 0.18                       | HTDMA | 150                    | 5.00 / 0.934                                                   | 3.8         | 75-500                 | 5.00 / 0.520                                                   | 74.9        | Feb         | 14b           | 11:38-11:45   | 2          | 60        | 120       | 261.6                                |                                        |

Supplement, Petters et al. (2023), Morphology hygroscopicity nanoplastics sea spray, PCCP

| Exp # | Soln #    | Salinity<br>g kg <sup>-1</sup> | PSL<br>mg kg <sup>-1</sup> | Type  | D <sub>dry</sub><br>nm | DMA 1 Q <sub>sh</sub> / Q <sub>sa</sub><br>L min <sup>-1</sup> | Dry RH<br>% | D <sub>wet</sub><br>nm | DMA 2 Q <sub>sh</sub> / Q <sub>sa</sub><br>L min <sup>-1</sup> | Wet RH<br>% | Date<br>mmm | Date<br>dd(#) | Time<br>hh:mm | s/bin<br>s | Bins<br>- | Scan<br>s | C <sub>tot</sub><br>cm <sup>-3</sup> | m <sub>tot</sub><br>μg m <sup>-3</sup> |
|-------|-----------|--------------------------------|----------------------------|-------|------------------------|----------------------------------------------------------------|-------------|------------------------|----------------------------------------------------------------|-------------|-------------|---------------|---------------|------------|-----------|-----------|--------------------------------------|----------------------------------------|
| 20    | 8         | 0                              | 0.18                       | SEMS  | 5-1000                 | 3.00 / 0.562                                                   | 3.3         |                        |                                                                |             | Feb         | 14-s2         | 11:47-11:51   | 2          | 60        | 120       | 93338                                | 6.3                                    |
| 21    | 7         | 7.52e-5                        | 0.18                       | SEMS  | 5-1000                 | 3.00 / 0.570                                                   | 3.1         |                        |                                                                |             | Feb         | 14-s3         | 11:53-11:58   | 2          | 60        | 120       | 119702                               | 6.9                                    |
| 22    | 7         | 7.52e-5                        | 0.18                       | HTDMA | 150                    | 5.00 / 0.956                                                   | 3.8         | 75-500                 | 5.00 / 0.512                                                   | 74.9        | Feb         | 14c           | 12:05-12:12   | 2          | 60        | 120       | 323.8                                |                                        |
| 23    | 6         | 4.96e-4                        | 0.18                       | HTDMA | 150                    | 5.00 / 0.961                                                   | 3.9         | 75-500                 | 5.00 / 0.510                                                   | 74.5        | Feb         | 14d           | 12:14-12:18   | 2          | 60        | 120       | 330.3                                |                                        |
| 24    | 6         | 4.96e-4                        | 0.18                       | SEMS  | 5-1000                 | 3.00 / 0.569                                                   | 3.4         |                        |                                                                |             | Feb         | 14-s4         | 12:20-12:25   | 2          | 60        | 120       | 145373                               | 7                                      |
| 25    | 5         | 3.27e-3                        | 0.18                       | SEMS  | 5-1000                 | 3.00 / 0.577                                                   | 3.2         |                        |                                                                |             | Feb         | 14-s5         | 12:28-12:33   | 2          | 60        | 120       | 298303                               | 12.4                                   |
| 26    | 5         | 3.27e-3                        | 0.18                       | HTDMA | 150                    | 5.00 / 0.935                                                   | 4.2         | 75-500                 | 5.02 / 0.491                                                   | 76.4        | Feb         | 14e           | 12:40-12:44   | 2          | 60        | 120       | 345.3                                |                                        |
| 27    | 4         | 0.022                          | 0.18                       | HTDMA | 150                    | 5.00 / 0.971                                                   | 4.2         | 75-500                 | 4.99 / 0.524                                                   | 75          | Feb         | 14f           | 12:48-12:52   | 2          | 60        | 120       | 481.8                                |                                        |
| 28    | 4         | 0.022                          | 0.18                       | SEMS  | 5-1000                 | 3.00 / 0.572                                                   | 3.6         |                        |                                                                |             | Feb         | 14-s6         | 12:54-12:58   | 2          | 60        | 120       | 838115                               | 41.3                                   |
| 29    | 3         | 0.14                           | 0.18                       | SEMS  | 5-1000                 | 3.00 / 0.577                                                   | 3.3         |                        |                                                                |             | Feb         | 14-s7         | 13:03-13:08   | 2          | 60        | 120       | 2076754                              | 238.9                                  |
| 30    | 3         | 0.14                           | 0.18                       | HTDMA | 150                    | 5.00 / 0.960                                                   | 3.7         | 75-500                 | 5.01 / 0.506                                                   | 75          | Feb         | 14g           | 13:09-13:14   | 2          | 60        | 120       | 8675.2                               |                                        |
| 31    | 2         | 0.94                           | 0.18                       | HTDMA | 150                    | 5.00 / 0.972                                                   | 4           | 75-500                 | 5.00 / 0.520                                                   | 75          | Feb         | 14h           | 13:17-13:24   | 2          | 60        | 120       | 85012                                |                                        |
| 32    | 2         | 0.94                           | 0.18                       | SEMS  | 5-1000                 | 3.00 / 0.572                                                   | 3.6         |                        |                                                                |             | Feb         | 14-s8         | 13:26-13:30   | 2          | 60        | 120       | 3710872                              | 1566                                   |
| 33    | 1         | 6.21                           | 0.18                       | SEMS  | 5-1000                 | 3.00 / 0.573                                                   | 3.3         |                        |                                                                |             | Feb         | 14-s9         | 13:33-13:38   | 2          | 60        | 120       | 4837814                              | 9774                                   |
| 34    | 1         | 6.21                           | 0.18                       | HTDMA | 150                    | 5.00 / 0.971                                                   | 3.8         | 75-500                 | 5.00 / 0.517                                                   | 75          | Feb         | 14i           | 13:39-13:46   | 2          | 60        | 120       | 389662                               |                                        |
| 35    | A+PSL     | 41                             | 0.18                       | SEMS  | 5-1000                 | 3.00 / 0.560                                                   | 5.7         |                        |                                                                |             | Feb         | 14-s10        | 14:09-14:13   | 2          | 60        | 120       | 5335758                              | 42617                                  |
| 36    | A+PSL     | 41                             | 0.18                       | HTDMA | 150                    | 5.01 / 0.835                                                   | 6.4         | 75-500                 | 5.00 / 0.472                                                   | 75          | Feb         | 14k           | 14:35-14:39   | 2          | 60        | 120       | 575486.2                             |                                        |
| 37    | A+PSL     | 41                             | 0.18                       | SEMS  | 5-1000                 | 3.00 / 0.556                                                   | 4.7         |                        |                                                                |             | Feb         | 14-s11        | 14:42-14:46   | 2          | 60        | 120       | 5208632                              | 47544.6                                |
| 38    | room air  |                                |                            | SEMS  | 5-1000                 | 3.00 / 0.571                                                   | 4.4         |                        |                                                                |             | Feb         | 14-s14        | 15:38-15:42   | 2          | 60        | 120       | 471.6                                | 0.7                                    |
| 39    | room air  |                                |                            | HTDMA | 150                    | 5.00 / 0.797                                                   | 3.3         | 75-500                 | 5.00 / 0.322                                                   | 75          | Mar         | 02a           | 13:37-13:46   | 2          | 60        | 120       | 0.3                                  |                                        |
| 40    | MilliQ    | 0                              | 0                          | HTDMA | 150                    | 5.00 / 0.983                                                   | 3.9         | 75-500                 | 5.00 / 0.518                                                   | 75.1        | Mar         | 02b           | 13:48-14:06   | 2          | 60        | 120       | 8.3                                  |                                        |
| 41    | MilliQ    | 0                              | 0                          | SEMS  | 5-1000                 | 3.00 / 0.576                                                   | 3.5         |                        |                                                                |             | Mar         | 02-s1         | 14:11-14:14   | 3          | 60        | 180       | 37131.8                              | 2.9                                    |
| 42    | 2d        | 0.151                          | 0.18                       | SEMS  | 5-1000                 | 3.00 / 0.584                                                   | 3.4         |                        |                                                                |             | Mar         | 02-s2         | 14:18-14:28   | 3          | 60        | 180       | 1740916                              | 223.4                                  |
| 43    | 2d        | 0.151                          | 0.18                       | HTDMA | 150                    | 5.00 / 0.974                                                   | 4           | 75-500                 | 5.00 / 0.506                                                   | 75.1        | Mar         | 02c           | 14:42-14:46   | 2          | 60        | 120       | 9350.1                               |                                        |
| 44    | 2c        | 0.239                          | 0.18                       | HTDMA | 150                    | 5.00 / 0.977                                                   | 4           | 75-500                 | 5.00 / 0.509                                                   | 75          | Mar         | 02d           | 15:07-15:14   | 2          | 60        | 120       | 14309.5                              |                                        |
| 45    | 2c        | 0.239                          | 0.18                       | SEMS  | 5-1000                 | 3.00 / 0.575                                                   | 3.5         |                        |                                                                |             | Mar         | 02-s3         | 15:27-15:33   | 3          | 60        | 180       | 2248376                              | 393                                    |
| 46    | 2b        | 0.378                          | 0.18                       | SEMS  | 5-1000                 | 3.00 / 0.579                                                   | 3.4         |                        |                                                                |             | Mar         | 02-s4         | 15:36-15:42   | 3          | 60        | 180       | 2443773                              | 510.8                                  |
| 47    | 2b        | 0.378                          | 0.18                       | HTDMA | 150                    | 5.00 / 0.970                                                   | 3.8         | 75-500                 | 5.00 / 0.508                                                   | 74.9        | Mar         | 02f           | 15:46-15:50   | 2          | 60        | 120       | 22258.2                              |                                        |
| 48    | 2a        | 0.596                          | 0.18                       | HTDMA | 150                    | 5.00 / 0.970                                                   | 4.1         | 75-500                 | 5.00 / 0.508                                                   | 74.9        | Mar         | 02i           | 16:07-16:11   | 2          | 60        | 120       | 45109.3                              |                                        |
| 49    | 2a        | 0.596                          | 0.18                       | SEMS  | 5-1000                 | 3.00 / 0.825                                                   | 4.7         |                        |                                                                |             | Mar         | 02-s5         | 16:12-16:19   | 3          | 60        | 180       | 3007183                              | 922.8                                  |
| 50    | 2d no PSL | 0.151                          | 0                          | HTDMA | 150                    | 6.50 / 1.013                                                   | 3.1         | 10-1036                | 5.00 / 0.515                                                   | 75          | Apr         | 26a           | 10:56-12:56   | 24         | 300       | 7200      | 1255                                 |                                        |
| 51    | 2d        | 0.151                          | 0.18                       | HTDMA | 150                    | 6.50 / 1.015                                                   | 3.1         | 10-1034                | 5.00 / 0.520                                                   | 74.9        | Apr         | 26b           | 13:09-13:16   | 2          | 60        | 120       | 3901                                 |                                        |
| 52    | 2d        | 0.151                          | 0.18                       | SEMS  | 10-827                 | 6.50 / 0.659                                                   | 2.2         |                        |                                                                |             | Apr         | 26-s1         | 13:17-13:24   | 2          | 60        | 120       | 883110                               | 82                                     |

Supplement, Petters et al. (2023), Morphology hygroscopicity nanoplastics sea spray, PCCP

| Exp # | Soln # | Salinity<br>g kg <sup>-1</sup> | PSL<br>mg kg <sup>-1</sup> | Type      | D <sub>dry</sub><br>nm | DMA 1 Q <sub>sh</sub> / Q <sub>sa</sub><br>L min <sup>-1</sup> | Dry RH<br>% | D <sub>wet</sub><br>nm | DMA 2 Q <sub>sh</sub> / Q <sub>sa</sub><br>L min <sup>-1</sup> | Wet RH<br>% | Date<br>mmm | Date<br>dd(#) | Time<br>hh:mm | s/bin<br>s | Bins<br>- | Scan<br>s | C <sub>tot</sub><br>cm <sup>-3</sup> | m <sub>tot</sub><br>μg m <sup>-3</sup> |
|-------|--------|--------------------------------|----------------------------|-----------|------------------------|----------------------------------------------------------------|-------------|------------------------|----------------------------------------------------------------|-------------|-------------|---------------|---------------|------------|-----------|-----------|--------------------------------------|----------------------------------------|
| 53    | 2d     | 0.151                          | 0.18                       | HTDMA-AMS | 150                    | 6.50 / 0.975                                                   | 2.9         | 10-1000                | 5.00 / 0.499                                                   | 75          | Apr         | 26c           | 14:07-15:42   | 19         | 300       | 5700      |                                      |                                        |
| 54    | 2d     | 0.151                          | 0.18                       | HTDMA-AMS | 150                    | 6.50 / 0.983                                                   | 3.3         | 50-750                 | 5.00 / 0.500                                                   | 75          | Apr         | 26d           | 15:51-17:57   | 25         | 300       | 7500      |                                      |                                        |
| 55    | MilliQ | 0                              | 0                          | HTDMA     | 150                    | 6.50 / 0.969                                                   | 3.2         | 10-1033                | 5.00 / 0.485                                                   | 74.9        | Apr         | 28a           | 09:36-10:01   | 5          | 300       | 1500      | 3.6                                  |                                        |
| 56    | MilliQ | 0                              | 0                          | SEMS      | 5-827                  | 6.50 / 0.657                                                   | 2.4         |                        |                                                                |             | Apr         | 28-s1         | 10:15-10:20   | 2          | 60        | 120       | 13963                                | 0.1                                    |
| 57    | 2c     | 0.239                          | 0.18                       | SEMS      | 5-827                  | 6.50 / 0.652                                                   | 2.3         |                        |                                                                |             | Apr         | 28-s2         | 10:37-10:41   | 2          | 60        | 120       | 1259805                              | 183                                    |
| 58    | 2c     | 0.239                          | 0.18                       | HTDMA     | 150                    | 6.50 / 0.988                                                   | 3           | 10-1032                | 5.00 / 0.499                                                   | 75          | Apr         | 28b           | 10:43-10:48   | 2          | 60        | 120       | 6280.4                               |                                        |
| 59    | 2c     | 0.239                          | 0.18                       | HTDMA-AMS | 150                    | 6.50 / 0.981                                                   | 3.3         | 10-1033                | 5.00 / 0.500                                                   | 75          | Apr         | 28c           | 10:50-12:55   | 25         | 300       | 7500      |                                      |                                        |
| 60    | 2b     | 0.378                          | 0.18                       | SEMS      | 5-827                  | 6.50 / 0.654                                                   | 2.4         |                        |                                                                |             | Apr         | 28-s3         | 13:06-13:08   | 2          | 60        | 120       | 1959978                              | 372.6                                  |
| 61    | 2b     | 0.378                          | 0.18                       | SEMS      | 5-827                  | 6.50 / 0.654                                                   | 2.4         |                        |                                                                |             | Apr         | 28-s3         | 13:06-13:08   | 2          | 60        | 120       | 1959978                              | 372.6                                  |
| 62    | 2b     | 0.378                          | 0.18                       | HTDMA     | 150                    | 6.51 / 0.979                                                   | 3           | 10-1032                | 5.00 / 0.502                                                   | 75          | Apr         | 28d           | 13:17-13:22   | 2          | 60        | 120       | 14959                                |                                        |
| 63    | 2b     | 0.378                          | 0.18                       | HTDMA-AMS | 150                    | 6.50 / 0.989                                                   | 3.4         | 25-1033                | 5.00 / 0.498                                                   | 75          | Apr         | 28e           | 13:23-15:28   | 25         | 300       | 7500      |                                      |                                        |
| 64    | 2a     | 0.596                          | 0.18                       | SEMS      | 5-827                  | 6.50 / 0.658                                                   | 2.4         |                        |                                                                |             | Apr         | 28-s4         | 15:34-15:39   | 2          | 60        | 120       | 2062373                              | 528.2                                  |
| 65    | 2a     | 0.596                          | 0.18                       | HTDMA     | 150                    | 6.51 / 0.977                                                   | 3.1         | 25-1032                | 5.00 / 0.487                                                   | 74.9        | Apr         | 28f           | 15:40-15:44   | 2          | 60        | 120       | 22787                                |                                        |
| 66    | 2a     | 0.596                          | 0.18                       | HTDMA-AMS | 150                    | 6.50 / 0.981                                                   | 3.5         | 25-1033                | 5.00 / 0.485                                                   | 75          | Apr         | 28g           | 15:45-17:51   | 25         | 300       | 7500      | 1482298                              |                                        |
| 67    | Ægor 1 | 0                              | 0.15                       | SEMS      | 50-500                 | 6.50 / 0.585                                                   | 2.7         |                        |                                                                |             | May         | 23-s1         | 13:13-13:20   | 2          | 60        | 120       | 26                                   | 0.1                                    |
| 68    | Ægor 1 | 0                              | 0.15                       | SEMS      | 50-500                 | 5.00 / 0.536                                                   | 3.3         |                        |                                                                |             | May         | 23-s2         | 13:21-13:25   | 2          | 60        | 120       | 21.7                                 | 0.1                                    |
| 69    | Ægor 1 | 0                              | 0.15                       | HTDMA     | 150                    | 5.37 / 0.884                                                   | 4.6         | 100-300                | 4.99 / 0.496                                                   | 74.9        | May         | 23c           | 14:01-14:20   | 1          | 120       | 120       | 6.1                                  |                                        |
| 70    | Ægor 1 | 0                              | 0.15                       | HTDMA-AMS | 150                    | 5.00 / 0.853                                                   | 5           | 100-400                | 5.00 / 0.492                                                   | 75          | May         | 23d           | 14:27-16:32   | 25         | 300       | 7500      |                                      |                                        |
| 71    | Ægor 1 | 0                              | 0.15                       | HTDMA     | 150                    | 5.00 / 0.857                                                   | 5.1         | 100-400                | 5.00 / 0.489                                                   | 75.1        | May         | 23e           | 16:36-16:43   | 1          | 180       | 180       | 36                                   |                                        |
| 72    | Ægor 2 | 0.01                           | 0.15                       | SEMS      | 5-1039                 | 5.00 / 0.534                                                   | 4           |                        |                                                                |             | May         | 23-s3         | 16:45-16:50   | 1          | 120       | 120       | 8000                                 | 1571.4                                 |
| 73    | Ægor 2 | 0.01                           | 0.15                       | SEMS      | 50-500                 | 5.00 / 0.534                                                   | 3.9         |                        |                                                                |             | May         | 23-s4         | 16:51-16:55   | 1          | 120       | 120       | 62.2                                 | 0.2                                    |
| 74    | Ægor 2 | 0.01                           | 0.15                       | HTDMA     | 150                    | 4.97 / 0.855                                                   | 4.9         | 100-400                | 4.97 / 0.483                                                   | 74.7        | May         | 23f           | 16:57-17:01   | 1          | 180       | 180       | 36.6                                 |                                        |
| 75    | Ægor 2 | 0.01                           | 0.15                       | HTDMA-AMS | 150                    | 5.00 / 0.859                                                   | 5.5         | 100-400                | 5.00 / 0.503                                                   | 75          | May         | 23g           | 17:02-19:08   | 25         | 300       | 7500      |                                      |                                        |
| 76    | Ægor 2 | 0.01                           | 0.15                       | HTDMA     | 150                    | 5.00 / 0.879                                                   | 5.5         | 100-400                | 5.00 / 0.504                                                   | 74.9        | May         | 23h           | 19:10-19:16   | 1          | 180       | 180       | 30.6                                 |                                        |
| 77    | Ægor 2 | 0.01                           | 0.15                       | SEMS      | 50-500                 | 5.00 / 0.534                                                   | 4.2         |                        |                                                                |             | May         | 23-s5         | 19:18-19:25   | 1          | 180       | 180       | 80.9                                 | 0.4                                    |
| 78    | Ægor 2 | 0.01                           | 0.15                       | SEMS      | 5-1040                 | 5.00 / 0.530                                                   | 4.1         |                        |                                                                |             | May         | 23-s6         | 19:26-19:29   | 1          | 180       | 180       | 6556                                 | 718.9                                  |
| 79    | Ægor 3 | 0.0215                         | 0.15                       | SEMS      | 5-1038                 | 5.00 / 0.554                                                   | 4.6         |                        |                                                                |             | May         | 24-s1         | 10:03-10:10   | 1          | 180       | 180       | 11760                                | 98.5                                   |
| 80    | Ægor 3 | 0.0215                         | 0.15                       | HTDMA     | 150                    | 5.00 / 0.852                                                   | 5           | 100-400                | 5.00 / 0.499                                                   | 75          | May         | 24a           | 10:25-10:48   | 1          | 180       | 180       | 29.4                                 |                                        |
| 81    | Ægor 3 | 0.0215                         | 0.15                       | HTDMA-AMS | 150                    | 5.00 / 0.845                                                   | 4.8         | 100-400                | 5.00 / 0.513                                                   | 75          | May         | 24b           | 10:51-12:57   | 25         | 300       | 7500      |                                      |                                        |
| 82    | Ægor 4 | 0.0464                         | 0.15                       | SEMS      | 5-1036                 | 5.00 / 0.516                                                   | 3.8         |                        |                                                                |             | May         | 24-s2         | 13:07-13:14   | 1          | 180       | 180       | 16164                                | 391.6                                  |
| 83    | Ægor 4 | 0.0464                         | 0.15                       | HTDMA     | 150                    | 5.00 / 0.836                                                   | 5           | 100-400                | 5.00 / 0.502                                                   | 75.1        | May         | 24c           | 13:23-13:27   | 1          | 180       | 180       | 41.2                                 |                                        |
| 84    | Ægor 4 | 0.0464                         | 0.15                       | HTDMA     | 150                    | 3.00 / 0.817                                                   | 6.1         | 100-400                | 5.00 / 0.519                                                   | 75          | May         | 24d           | 13:28-13:34   | 1          | 180       | 180       | 43.3                                 |                                        |
| 85    | Ægor 4 | 0.0464                         | 0.15                       | HTDMA-AMS | 150                    | 3.00 / 0.797                                                   | 6.4         | 100-400                | 5.00 / 0.501                                                   | 75          | May         | 24e           | 13:37-15:43   | 25         | 300       | 7500      |                                      |                                        |

*Supplement, Petters et al. (2023), Morphology hygroscopicity nanoplastics sea spray, PCCP*

| Exp # | Soln # | Salinity<br>g kg <sup>-1</sup> | PSL<br>mg kg <sup>-1</sup> | Type      | D <sub>dry</sub><br>nm | DMA 1 Q <sub>sh</sub> / Q <sub>sa</sub><br>L min <sup>-1</sup> | Dry RH<br>% | D <sub>wet</sub><br>nm | DMA 2 Q <sub>sh</sub> / Q <sub>sa</sub><br>L min <sup>-1</sup> | Wet RH<br>% | Date<br>mmm | Date<br>dd(#) | Time<br>hh:mm | s/bin<br>s | Bins<br>- | Scan<br>s | C <sub>tot</sub><br>cm <sup>-3</sup> | m <sub>tot</sub><br>μg m <sup>-3</sup> |
|-------|--------|--------------------------------|----------------------------|-----------|------------------------|----------------------------------------------------------------|-------------|------------------------|----------------------------------------------------------------|-------------|-------------|---------------|---------------|------------|-----------|-----------|--------------------------------------|----------------------------------------|
| 86    | Ægor 5 | 0.1                            | 0.15                       | HTDMA     | 150                    | 3.00 / 0.789                                                   | 6.9         | 100-400                | 5.00 / 0.503                                                   | 74.9        | May         | 24f           | 15:48-16:08   | 1          | 180       | 180       | 42.4                                 |                                        |
| 87    | Ægor 5 | 0.1                            | 0.15                       | SEMS      | 5-1500                 | 3.00 / 0.480                                                   | 5.7         |                        |                                                                |             | May         | 24-s3         | 16:13-16:19   | 1          | 180       | 180       | 25800                                | 2.6                                    |
| 88    | Ægor 5 | 0.1                            | 0.15                       | SEMS      | 100-400                | 3.00 / 0.481                                                   | 5.5         |                        |                                                                |             | May         | 24-s4         | 16:20-16:27   | 1          | 180       | 180       |                                      |                                        |
| 89    | Ægor 5 | 0.1                            | 0.15                       | HTDMA-AMS | 150                    | 3.00 / 0.791                                                   | 7.7         | 100-400                | 5.00 / 0.497                                                   | 75          | May         | 24g           | 16:30-18:35   | 25         | 300       | 7500      |                                      |                                        |
| 90    | Ægor 6 | 0.2154                         | 0.15                       | SEMS      | 5-1649                 | 3.00 / 0.504                                                   | 5.6         |                        |                                                                | 1           | May         | 25-s1         | 10:26-10:33   | 1          | 180       | 180       | 53782                                | 1.9                                    |
| 91    | Ægor 6 | 0.2154                         | 0.15                       | HTDMA     | 150                    | 3.00 / 0.790                                                   | 6.6         | 5-1034                 | 5.00 / 0.486                                                   | 75          | May         | 25a           | 10:35-10:59   | 1          | 180       | 180       | 26.2                                 |                                        |
| 92    | Ægor 6 | 0.2154                         | 0.15                       | HTDMA     | 150                    | 3.00 / 0.810                                                   | 6.6         | 100-400                | 5.00 / 0.492                                                   | 74.9        | May         | 25b           | 10:59-11:12   | 1          | 180       | 180       | 63.5                                 |                                        |
| 93    | Ægor 6 | 0.2154                         | 0.15                       | HTDMA-AMS | 150                    | 3.00 / 0.815                                                   | 6.7         | 100-400                | 5.00 / 0.505                                                   | 75          | May         | 25c           | 11:32-13:37   | 25         | 300       | 7500      |                                      |                                        |
| 94    | Ægor 7 | 0.464                          | 0.15                       | SEMS      | 5-1645                 | 3.00 / 0.488                                                   | 5           |                        |                                                                | 1           | May         | 25-s2         | 13:47-13:54   | 1          | 180       | 180       |                                      |                                        |
| 95    | Ægor 7 | 0.464                          | 0.15                       | HTDMA     | 150                    | 3.00 / 0.810                                                   | 6.5         | 5-1034                 | 5.00 / 0.496                                                   | 74.9        | May         | 25d           | 14:01-14:08   | 1          | 180       | 180       | 84.8                                 |                                        |
| 96    | Ægor 7 | 0.464                          | 0.15                       | HTDMA     | 150                    | 3.00 / 0.808                                                   | 6.6         | 100-400                | 5.00 / 0.497                                                   | 75          | May         | 25e           | 14:09-14:19   | 1          | 180       | 180       | 240                                  |                                        |
| 97    | Ægor 7 | 0.464                          | 0.15                       | HTDMA-AMS | 150                    | 3.00 / 0.820                                                   | 7           | 100-400                | 5.00 / 0.512                                                   | 75          | May         | 25f           | 14:21-16:26   | 25         | 300       | 7500      |                                      |                                        |
| 98    | Ægor 7 | 0.464                          | 0.15                       | HTDMA     | 150                    | 3.00 / 0.804                                                   | 6.9         | 100-400                | 5.00 / 0.495                                                   | 75.2        | May         | 25g           | 16:34-16:51   | 1          | 300       | 300       |                                      |                                        |
| 99    | Ægor 8 | 1                              | 0.15                       | HTDMA     | 150                    | 3.00 / 0.793                                                   | 6.8         | 100-400                | 5.00 / 0.488                                                   | 74.9        | May         | 25h           | 16:56-17:01   | 1          | 300       | 300       | 1328                                 |                                        |
| 100   | Ægor 8 | 1                              | 0.15                       | SEMS      | 5-1645                 | 3.00 / 0.486                                                   | 5.2         |                        |                                                                | 1           | May         | 25-s3         | 17:03-17:15   | 1          | 180       | 180       |                                      |                                        |
| 101   | Ægor 8 | 1                              | 0.15                       | HTDMA     | 150                    | 3.00 / 0.784                                                   | 6.4         | 100-400                | 5.00 / 0.485                                                   | 75          | May         | 25i           | 17:18-17:20   | 1          | 120       | 120       | 372                                  |                                        |
| 102   | Ægor 8 | 1                              | 0.15                       | HTDMA-AMS | 150                    | 3.00 / 0.804                                                   | 7           | 100-400                | 5.00 / 0.496                                                   | 75          | May         | 25j           | 17:22-19:52   | 30         | 300       | 9000      |                                      |                                        |
| 103   | Ægor 8 | 1                              | 0.15                       | HTDMA     | 150                    | 3.00 / 0.810                                                   | 7           | 100-400                | 5.00 / 0.497                                                   | 74.9        | May         | 25k           | 20:21-20:25   | 1          | 120       | 120       | 312                                  |                                        |
| 104   | Ægor 8 | 1                              | 0.15                       | SEMS      | 5-1645                 | 3.00 / 0.488                                                   | 5           |                        |                                                                | 1           | May         | 25-s4         | 20:27-20:32   | 1          | 180       | 10        |                                      |                                        |
| 105   | no     | 0                              | 0                          | SEMS      | 5-1035                 | 5.00 / 0.535                                                   | 3.7         |                        |                                                                | 1           | Jun         | 02-s1         | 11:36-12:56   | 180        | 180       | 180       | 60.4                                 | 30.9                                   |
| 106   | Ægor 9 | 0                              | 0                          | SEMS      | 5-1033                 | 5.00 / 0.525                                                   | 3.3         |                        |                                                                | 1           | Jun         | 02-s2         | 12:57-13:27   | 180        | 180       | 180       | 134.8                                | 36.1                                   |
| 107   | Ægor 9 | 0                              | 0                          | HTDMA     | 150                    | 5.00 / 0.829                                                   | 4.5         | 100-400                | 5.00 / 0.488                                                   | 75.1        | Jun         | 02a           | 13:34-14:14   | 0.33       | 180       | 60        | 0.3                                  |                                        |

## Section S2. Instrumentation

### S2.1. AMS Mass Resolution

Table S2 shows the mass resolution of the HR-ToF-AMS for selected experiments. The resolution was determined at calibration and remained close to the nominal value of 2500. The resolution indicates the number of bins relative to the  $m/z$  axis. Note that the ability to distinguish between ions with very similar masses is determined by the peak width, rather than the mass resolution.

**Table S2.** Mass resolution. The overall average resolution was  $m/\Delta m = 2553 \pm 147$ .

| Date 2022 | Resolution, $m/\Delta m$ | $\pm 1$ std dev | Date 2022, cont'd | Resolution, $m/\Delta m$ , cont'd | $\pm 1$ std dev, cont'd |
|-----------|--------------------------|-----------------|-------------------|-----------------------------------|-------------------------|
| 1-Mar     | 2653                     | 140             | 26-Apr            | 2428                              | 143                     |
| 3-Mar     | 2645                     | 139             | 28-Apr            | 2438                              | 141                     |
| 4-Mar     | 2636                     | 127             | 2-May             | 2411                              | 154                     |
| 8-Mar     | 2587                     | 161             | 4-May             | 2614                              | 144                     |
| 11-Mar    | 2578                     | 118             | 9-May             | 2639                              | 172                     |
| 14-Mar    | 2459                     | 164             | 11-May            | 2628                              | 151                     |
| 15-Mar    | 2516                     | 166             | 23-May            | 2569                              | 96                      |
| 16-Mar    | 2560                     | 143             | 24-May            | 2527                              | 139                     |
| 17-Mar    | 2527                     | 175             | 25-May            | 2535                              | 144                     |
| 18-Mar    | 2561                     | 177             |                   |                                   |                         |

### S2.2. AMS Vaporizer Characterization

Table S3 gives the measurements for this work that are shown in Figure 2.

**Table S3.** Vaporizer characterization. (A) Characterization of vaporizer control box setting “95”, Figure 2, panel A, blue x’s. (B) Ramping vaporizer setting, Figure 2, panel A, black crosses. (C) Vaporizer setting “80”, Figure 2, panel A, blue x’s. (D) Characterization of vaporizer temperature, Figure 2, panel C, black circles.

| (A) Setting = 95       |              |            |                | (B) Setting vs Current |             |                |
|------------------------|--------------|------------|----------------|------------------------|-------------|----------------|
| Current Amp            | Voltage Volt | Power Watt | Date in 3/2022 | Setting                | Current Amp | Date in 3/2022 |
| 1.20                   | 4.84         | 5.82       | 14             | 73                     | 0.8         | 8              |
| 1.21                   | 4.86         | 5.80       | 14             | 76                     | 0.86        | 8              |
| 1.17                   | 4.87         | 5.81       | 14             | 82                     | 0.99        | 8              |
| 1.21                   | 4.82         | 5.71       | 15             | 87                     | 1.05        | 8              |
| 1.18                   | 4.86         | 5.79       | 15             | 90                     | 1.09        | 8              |
| 1.20                   | 4.86         | 5.84       | 17             | 93                     | 1.16        | 8              |
| 1.18                   | 4.86         | 5.75       | 17             | 96                     | 1.2         | 8              |
| 1.21                   | 4.86         | 5.80       | 17             | 99                     | 1.27        | 8              |
| 1.18                   | 4.87         | 5.71       | 17             | 100                    | 1.3         | 8              |
| 1.20                   | 4.87         | 5.71       | 17             | 97                     | 1.24        | 8              |
| 1.19                   | 4.88         | 5.86       | 18             | 90                     | 1.1         | 8              |
| 1.18                   | 4.87         | 5.76       | 18             | 87                     | 1.07        | 8              |
| <b>Avg:</b>            | 1.19         | 4.86       | 5.78           |                        |             |                |
| <b>Std Dev:</b>        | 0.01         | 0.02       | 0.05           |                        |             |                |
| <b>R<sub>95</sub>:</b> | 4.08 Ohm     |            |                |                        |             |                |

Table S3, cont'd.

| <b>(C) Setting = 80</b> |                        |                         |                       | <b>(D) Setting vs Temperature</b> |                |                        |                       |                    |                        |                           |
|-------------------------|------------------------|-------------------------|-----------------------|-----------------------------------|----------------|------------------------|-----------------------|--------------------|------------------------|---------------------------|
|                         | <b>Current<br/>Amp</b> | <b>Voltage<br/>Volt</b> | <b>Power<br/>Watt</b> | <b>Date in<br/>3/2022</b>         | <b>Setting</b> | <b>Current<br/>Amp</b> | <b>Power<br/>Watt</b> | <b>Temp<br/>°C</b> | <b>Tau<sup>a</sup></b> | <b>Date in<br/>3/2020</b> |
|                         | 0.93                   | 3.07                    | 2.86                  | 1                                 | 73             | 0.8                    | 1.9                   | 465                |                        | 10                        |
|                         | 0.93                   | 3.07                    | 2.86                  | 1                                 | 78             | 0.9                    | 2.5                   | 500                |                        | 10                        |
|                         | 0.93                   | 3.10                    | 2.97                  | 4                                 | 83             | 1                      | 3.27                  | 532                |                        | 10                        |
|                         | 0.95                   | 3.08                    | 2.93                  | 14                                | 89             | 1.1                    | 4.38                  | 571                |                        | 10                        |
|                         | 0.95                   | 3.08                    | 2.92                  | 15                                | 95             | 1.2                    | 5.7                   | 812                |                        | 10                        |
|                         | 0.93                   | 3.11                    | 2.92                  | 18                                | 73             | 0.8                    | 1.9                   | 430                |                        | 10                        |
| <b>Avg:</b>             | 0.94                   | 3.09                    | 2.91                  |                                   | 78             | 0.9                    | 2.55                  | 532                |                        | 10                        |
| <b>Std Dev:</b>         | 0.01                   | 0.02                    | 0.04                  |                                   | 81             | 0.95                   | 3                     | 580                |                        | 10                        |
| <b>R<sub>80</sub>:</b>  | 3.29 Ohm               |                         |                       |                                   | 83             | 1                      | 3.3                   | 570                |                        | 10                        |
|                         |                        |                         |                       |                                   | 86             | 1.04                   | 3.9                   | 610                |                        | 10                        |
|                         |                        |                         |                       |                                   | 89             | 1.09                   | 4.4                   | 648                |                        | 10                        |
|                         |                        |                         |                       |                                   | 92             | 1.13                   | 5.1                   | 560                |                        | 10                        |
|                         |                        |                         |                       |                                   | 95             | 1.19                   | 5.8                   | 682                |                        | 10                        |
|                         |                        |                         |                       |                                   | 98             | 1.24                   | 6.2                   | 808                |                        | 10                        |
|                         |                        |                         |                       |                                   | 73             | 0.8                    | 1.9                   | 440                | 0.00281                | 10                        |
|                         |                        |                         |                       |                                   | 78             | 0.9                    | 2.55                  | 520                | 0.00039                | 10                        |
|                         |                        |                         |                       |                                   | 81             | 0.95                   | 3.05                  | 606                | 0.00016                | 10                        |
|                         |                        |                         |                       |                                   | 83             | 0.99                   | 3.35                  | 608                | 0.00012                | 10                        |
|                         |                        |                         |                       |                                   | 86             | 1.04                   | 3.9                   | 629                | 9.93E-05               | 10                        |
|                         |                        |                         |                       |                                   | 89             | 1.09                   | 4.45                  | 730                | 0.00011                | 10                        |
|                         |                        |                         |                       |                                   | 92             | 1.13                   | 5.15                  | 800                | 9.09E-05               | 10                        |
|                         |                        |                         |                       |                                   | 95             | 1.19                   | 5.75                  | 840                | 8.33E-05               | 10                        |
|                         |                        |                         |                       |                                   | 98             | 1.24                   | 6.2                   | 822                | 8.26E-05               | 10                        |

<sup>a</sup> Tau (in seconds) is for the m/z 30 signal from atomized NaNO<sub>3</sub> measured by the AMS in PToF mode. See e.g. Williams et al. (2010).

### S2.3. HTDMA Inversion

Figure S1 shows the results of the inversion used to find the hygroscopic growth factors from the humidified size distributions.

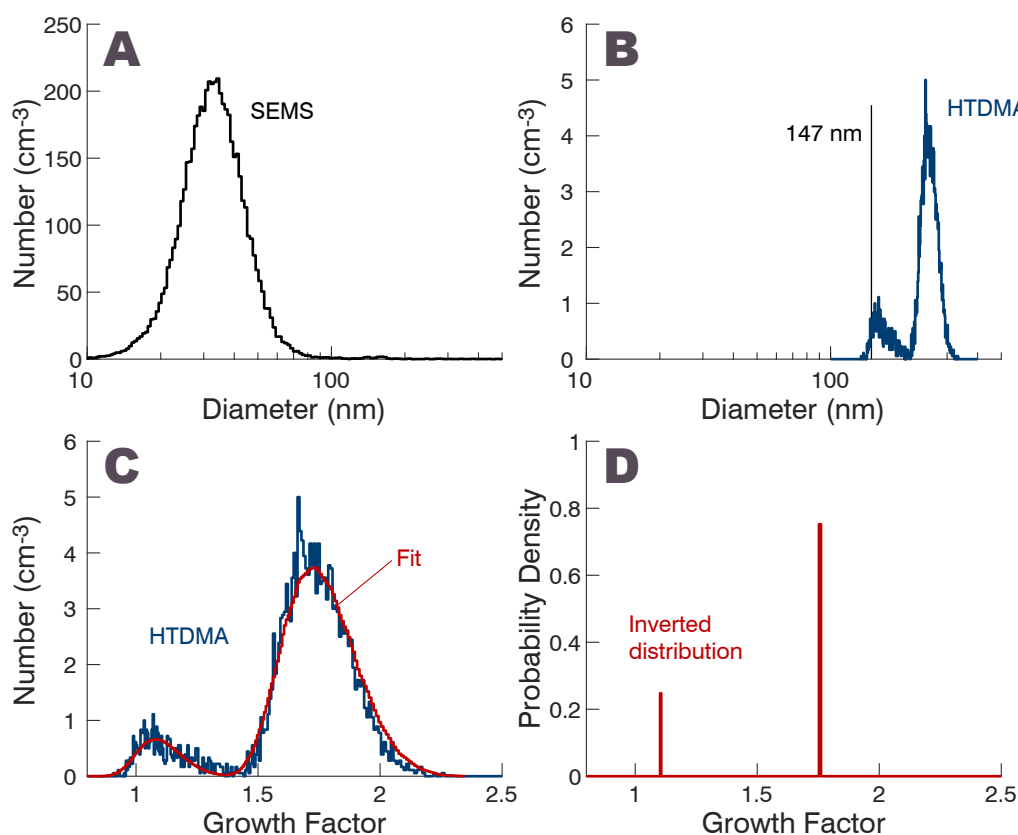

**Figure S1.** Growth factor inversion using RegularizationTools.jl (Petters, 2021), published under the GNU General Public License (<https://github.com/mdpetters/RegularizationTools.jl>). (A) Raw particle counts (experiment #94 in Table S1), (B) raw growth factor scan (experiment #98 in Table S1), (C) fitted two-component model, (D) inversion of fitted size distribution to approximate the distribution of particles between two growth factors (Fitted the growth factors were GF = 1.10 and GF = 1.76. Probability density is the fraction of particles falling into each growth factor bin. Note that the size distributions are not inverted and have units of particles per cm<sup>3</sup>).

## Section S3. AMS data analysis

The ToF-AMS Analysis Toolkit 1.65C (Squirrel 1.65C) was used to convert the time-of-flight signal to masses, apply the airbeam correction, and subtract the average background from each high-resolution mass spectrum. ToF-AMS HR Analysis 1.25C (Pika 1.25C) was used to determine the peak shape factor and prepare the background-subtracted, airbeam-corrected data for high-resolution analysis. MATLAB R2021a was used to convert peaks in the high-resolution spectra to ion signal (Hz) and to estimate the mass of species of interest ( $\mu\text{g m}^{-3}$ ).

### S3.1. Mass calibration

Data were loaded using ToF-AMS Analysis Toolkit 1.65C (Squirrel 1.65C; Sueper et al., 2011) and the  $m/z$  axis was calibrated using the ions listed in Table S4. The mass calibration



was performed independently for the open and closed mass spectra series to correct misalignment of peaks in the open and closed spectra. Equation S1.1 is used to match the ion's mass to its flight time:

$$x_{ToF} = p_1(t) + p_2(t) x_{mass}^{p_3(t)}. \quad \text{Eq. S1}$$

Here,  $x_{mass}$  is the  $m/z$  value,  $x_{ToF}$  is the time-of-flight bin number, or, as identified in the SQUIRREL software, the sample number. Initial defaults of  $p_1 = -7215.10$ ,  $p_2 = 2827.21$ , and  $p_3 = 0.5000$  are used to find the peaks before correcting the mass axis. In this work, typical fitted values were  $p_1 = -7214$ ,  $p_2 = 2827$ , and  $p_3 = 0.5$ . The typical resolution  $m/\Delta m$  was  $\sim 2500$ .

**Table S4.**  $m/z$  calibration.

| Ion                                                             | $m/z$     | Used in this work? | Used by default in Squirrel 1.65C? |
|-----------------------------------------------------------------|-----------|--------------------|------------------------------------|
| C+                                                              | 12        | yes, added         | no                                 |
| OH+                                                             | 17.002739 | yes                | yes                                |
| H <sub>2</sub> O+                                               | 18.010565 | yes                | yes                                |
| O <sub>2</sub> +                                                | 31.98983  | yes                | yes                                |
| Ar+                                                             | 39.962383 | yes                | yes                                |
| CO <sub>2</sub> +                                               | 43.98983  | yes                | yes                                |
| C <sub>8</sub> H <sub>5</sub> O <sub>3</sub> +                  | 149.02386 | yes, added         | no                                 |
| W182+                                                           | 181.94821 | no, removed        | yes                                |
| W184+                                                           | 183.95093 | yes                | yes                                |
| W186+                                                           | 185.95436 | no, removed        | yes                                |
| C <sub>5</sub> H <sub>15</sub> O <sub>3</sub> Si <sub>3</sub> + | 207.0329  | yes, added         | no                                 |

### S3.2. Air beam

The airbeam correction was applied using the average of all runs within the experiment's duration. The correction factor for changes in the air beam was typically in the range 0.98–1.0.

### S3.3. Background subtraction

The background subtraction algorithm was applied to the entire experiment uniformly using the default Tofwerk parameterization with Width = 15, Noise scaling = 1.0, f2 = 0.05, N = 20, and including a low-pass filter.

### S3.4. Peak shape factor

In order to prepare the data for quantification, a peak shape and peak shape factor are chosen based on a common ion averaged over the entire dataset. The shape factor,  $\nu$ , corrects the fitted peak area for shape irregularities, and is equal to the ratio of the integral of the average peak to that of a perfect Gaussian (Corbin et al., 2015; Sueper et al., 2011). The shape factor was found for each experiment using PIKA 1.25C with the ions Ar+ and O<sub>2</sub>+ (for lefthand side of the pseudo-Gaussian), and O<sub>2</sub>+ (for the righthand side of the pseudo-Gaussian). The final  $\nu$  was 1.0774 in this case.

### S3.5. Preparation for high-resolution fitting

The background-subtracted, airbeam-corrected data for the open, closed and difference mass spectra series (Pedro Compuzano-Jost, personal communication), with a resolution of  $\sim 50$  k ToF bins  $\text{min}^{-1}$ , were exported as plain text. The mass calibration parameters ( $p_1(t)$ ,  $p_2(t)$ , and  $p_3(t)$  from Eqn. S1.1) were also exported with 1-min resolution.

The data are imported into MATLAB R2021a. For each run, the  $x_{\text{ToF}}$  bins are converted to  $x_{\text{mass}}$  values ranging from about  $m/z = 10$  to 400 by rearranging Eqn. S1.1:

$$x_{\text{mass}} = \left( \frac{x_{\text{ToF}} - p_1(t)}{p_2(t)} \right)^{1/p_3(t)} \quad \text{Eq. S2}$$

As before, the Open and Closed spectra have different fitting parameters. The Diff mass spectra are assigned to the Open calibration parameters.

### S3.6. Fitting a Gaussian curve to peaks in the high-resolution mass spectrum

Following Corbin et al. (2015), a superposition of up to four Gaussian curves is fit to the peaks found within each unit mass. MATLAB was used to fit these. The  $i^{\text{th}}$  curve is described by

$$G_i(x_{\text{mass}}) = h_i \exp\left(-\frac{(x_{\text{mass}} - (\mu_i^0 + \delta\mu))^2}{w^2}\right) \quad \text{Eq. S3}$$

where  $G(x_{\text{mass}})$  is the value in Hz/ns observed by the multichannel plate,  $x_{\text{mass}}$  is the  $m/z$  axis,  $h_i$  is the height of the  $i^{\text{th}}$  peak,  $\mu_i$  is the  $m/z$  value of the  $i^{\text{th}}$  peak, and  $w$  is the Gaussian width parameter (Corbin et al. 2015 and Sueper et al. 2011<sup>‡</sup>). For each unit mass,  $2i + 2$  parameters are generally fit, e.g., for three peaks the fitted parameter matrix will consist of  $h_1, h_2, h_3, \delta\mu$ , and  $w$  for each unit mass of interest, with 1-min resolution. The peaks are allowed to shift together by  $\delta\mu = m/z \pm 0.0015$  to help correct for variability in the mass calibration. Fitting is performed for masses of interest separately. For example, to find the ion flux at  $m/z$  35, only the ToF data between  $m/z$  34.8 to  $m/z$  35.2 are fit.

The mass accuracy of our measurements was estimated for the salt ions by comparing the fitted mass centroid to the nominal mass. Table S5 shows that our measurement captured the true mass of the salt ions within  $+200/-50$  ppm.

The area of peak  $i$  is given by (Corbin et al. 2015)

$$A_i(x; v, h_i, \mu, w) = v h_i \int \exp\left(-\frac{(x - (\mu_i^0 + \delta\mu))^2}{w^2}\right) dx \quad \text{Eq. S4}$$

Using the common integral definition <sup>2,3</sup>,

$$\int e^{ax^2} dx = \sqrt{\pi/a},$$

and assigning  $x' = x - (\mu_i^0 + \delta\mu)$  and  $a = 1/w^2$ , the indefinite integral of this work becomes  $\int x^{ax'^2} dx = \sqrt{\pi/a} = w\sqrt{\pi}$ , and the area of the  $i^{\text{th}}$  pseudo-Gaussian curve is then:

$$A_i(v, h_i, w) = v h_i w \sqrt{\pi} \quad \text{Eq. S5}$$

The width  $w$  has units of  $m/z$  ( $w_{mass}$ ), but the width in bins ( $w_{TOF}$ ) is needed in Eq. S5. This is found by defining  $x_{mass}^{hi\ or\ lo} = (\mu_i + \delta\mu) \pm w_{mass}/2$ , then converting units as before:  $x_{TOF}^{hi\ or\ lo} = p_1 + p_2 (x_{mass}^{hi\ or\ lo})^{p_3}$ , and then the width in bins is  $w_{TOF} = x_{TOF}^{hi} - x_{TOF}^{lo}$ . The calculated  $A$  is the ion flux, in units of Hz, and is referred to hereafter as  $I$ .

### S3.7. Ions of interest

The chloride family consisted of  $m/z$  35, 36, 37, 38, 58. The ions associated with PSL were 104, 103, and 78. These are three of the ions found in the NIST spectrum and in Hasager et al.<sup>4</sup>

### S3.8. Particle Time-of-Flight Measurement

Particle Time-of-Flight measurements were performed using the unit-mass resolution data. A simple matrix deconvolution was performed with the default baseline region of 0.25. Conversion of the time of flight to particle velocity is accomplished via  $v_p = \text{distance}/\text{time}$  ( $m\ s^{-1}$ ), where the distance of the PToF region is 0.295 m, and the resolution of 254 PToF bins (between 0.5 and 6 ms). Vacuum aerodynamic diameter ( $D_{va}$ ) was found via:

$$D_{va} = D_x \left( \frac{v_{gas} - v_{lens}}{v_p - v_{lens}} - 1 \right)^{1/b} \quad \text{Eq. S6}$$

where  $D_x = 20.443\ \text{nm}$ ,  $v_{gas} = 472.94\ \text{m}\ s^{-1}$  is the velocity of the gas after acceleration in the aerodynamic lens,  $v_{lens} = 44.959\ \text{m}\ s^{-1}$  is the gas velocity within the aerodynamic lens,  $D_x = 20.443\ \text{nm}$  is a fitting constant, and  $b = 0.68347$  is a fitting constant.

### S3.9. Timeseries and signal-to-noise

The timeseries of two back-to-back HTDMA-AMS experiments on April 26, 2022 was analyzed to determine the best peaks for quantification of salt, polystyrene, and the ionization efficiencies of these for our setup (Figures S2 and S3). The signal to noise ratio (SNR) of the styrene peaks to the background is defined by

$$\text{SNR} = 2H/h \quad \text{Eq. S7}$$

where  $H = \max(y_{pk}) - \text{mean}(y_{bg})$  and  $h = 2 \times \text{std}(y_{bg})$ ,  $y$  is the  $y$ -axis value,  $pk$  denotes the range of values within the peak, and  $bg$  denotes the values outside the peak. Table S5 shows the SNR for two experiments on April 26, 2022. The high-resolution  $mz104$  ion was the best indicator of styrene. Figures S2 and S3 show the signal-to-noise ratio for salts and styrene peaks, and Table S5 and S6 give the values.

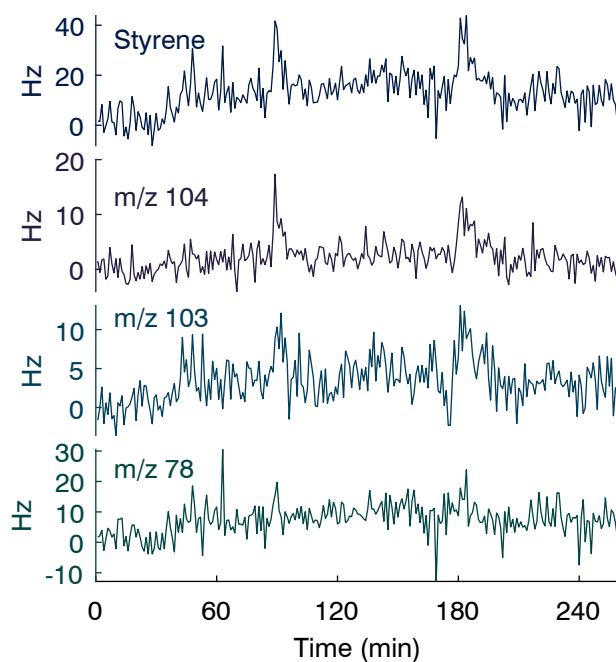

**Figure S2.** Timeseries of total styrene ( $m/z$  104+103+78, family of ions) (top),  $m/z$  104 (second),  $m/z$  103 (third), and  $m/z$  78 (bottom plot). Two experiments are shown, thus styrene detected at  $\sim 90$  min and again at about 190 min. The experiment shown is from April 26, 2022. The second experiment started at 126 min.

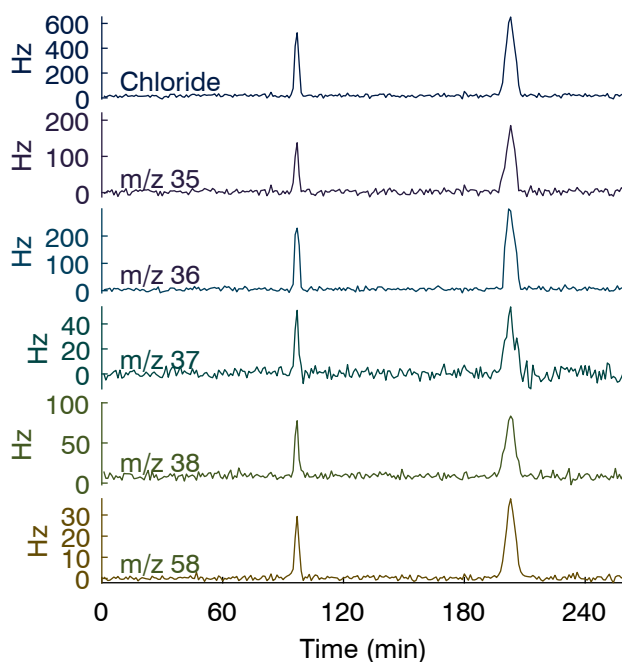

**Figure S3.** The second experiment started at 126 min. The scan duration was increased for the second experiment.

**Table S5.** Signal to noise ratios for April 26 dataset, experiments 1 and 2.

| m/z                | HR name             | m/z nom  | m/z fit          | Signal-to-Noise, Figure S3 | SQUIRREL <sup>a</sup> |
|--------------------|---------------------|----------|------------------|----------------------------|-----------------------|
| 35, 36, 37, 38, 58 | Cl                  | n/a      |                  | 48.9244, 37.4713           | 39.1505, 29.3009      |
| Cl (default UMR)   | n/a                 | n/a      |                  | n/a                        | 39.1505, 29.3009      |
| 35                 | <sup>35</sup> Cl    | 34.96885 | 34.9721, 34.9702 | 24.1901, 18.6686           | 30.2104, 21.0543      |
| 36                 | H <sup>35</sup> Cl  | 35.97668 | 35.9787, 35.9756 | 34.9922, 24.6654           | 35.9901, 27.9141      |
| 37                 | <sup>37</sup> Cl    | 36.9659  | 36.9704, 36.9705 | 19.3078, 13.8455           | 13.3420, 9.2272       |
| 38                 | H <sup>37</sup> Cl  | 37.97373 | 37.9780, 37.9743 | 20.3368, 20.3368           | 12.8695, 10.1410      |
| 58                 | Na <sup>35</sup> Cl | 57.95862 | 57.9646, 57.9690 | 39.3738, 33.8367           | 13.0696, 9.8431       |

<sup>a</sup>ToF-AMS Analysis Toolkit 1.65C loaded with ToF\_AMS\_HRAnalysis\_v1\_25C.pxt.

**Table S6.** Signal to noise ratios for April 26 dataset, experiments 1 and 2.

| Name                 | Signal-to-Noise, Figure S2 | SQUIRREL <sup>a</sup> |
|----------------------|----------------------------|-----------------------|
| mz104 + mz103 + mz78 | 4.5646, 4.9437             | 4.3998, 5.7753        |
| mz104                | 8.3877, 6.0307             | 7.5514, 7.2198        |
| mz103                | 2.7192, 3.9370             | 2.2459, 3.2193        |
| mz78                 | 2.3439, 3.2816             | 2.1227, 3.9865        |

<sup>a</sup>ToF-AMS Analysis Toolkit 1.65C loaded with ToF\_AMS\_HRAnalysis\_v1\_25C.pxt.

## Section S4. Ionization Efficiency

The HSEMS scan on April 26, before the HTDMA-AMS scan, showed a peak in PSL and in salt (Figure 5 in the main text). The SEMS measurement gives 0.136 ug/m<sup>3</sup> PSL and 33.12 µg/m<sup>3</sup> salts (density 1.2 g/cm<sup>3</sup> for salt, 1.05 for PSL).

Ionization efficiency (IE, ions per molecule) is obtained by the comparison of the condensation particle counter (CPC) measurement of molecules of species *i* per m<sup>3</sup> to the AMS measurement of ions of species *i* per m<sup>3</sup>.

The relative ionization efficiency (RIE) is obtained by comparison to the nitrate ionization efficiency:

$$RIE_i = \frac{IE_i}{IE_{NO_3}} \times \frac{M_{w,NO_3}}{M_{w,i}} \quad \text{Eq. S8}$$

### S4.1. Nitrate

Table S7 shows the results of the nitrate calibration. Particles are assumed to be pure ammonium nitrate, and the sum of the signal at m/z 30 (NO<sup>+</sup>, m/z 29.99799) and 46 (NO<sub>2</sub><sup>+</sup>, m/z 45.9929) is used to quantify nitrate ionization efficiency. The molar masses of NO<sub>3</sub> and NH<sub>4</sub>NO<sub>3</sub> are 62 (61.98782) and 80, respectively.

The volume concentration of particulate matter (PM) is found using the CPC measurement of number concentration and the mobility diameter (*D*):

$$c_{CPC} \left( \frac{\text{cm}^3 \text{ PM}}{\text{m}^3 \text{ air}} \right) = \left( c_{CPC} \frac{\# \text{ of particles}}{\text{cm}^3 \text{ air}} \right) \left( \frac{\pi}{6} D^3 \text{ nm}^3 \right) \left( \frac{10^6 \text{ cm}^3 \text{ air}}{\text{m}^3 \text{ air}} \times \frac{10^{-21} \text{ cm}^3 \text{ PM}}{\text{nm}^3 \text{ PM}} \right) \quad \text{Eq. S9}$$

Volume concentration is converted to mass concentration (ammonium nitrate  $\rho = 1.72 \text{ g cm}^{-3}$ ):

$$c_{\text{CPC}} \left( \frac{\mu\text{g PM}}{\text{m}^3 \text{ air}} \right) = \left( c_{\text{CPC}} \frac{\text{cm}^3 \text{ PM}}{\text{m}^3 \text{ air}} \right) \left( \rho \frac{\text{g PM}}{\text{cm}^3 \text{ PM}} \right) \left( \frac{10^6 \mu\text{g}}{\text{g}} \right) \quad \text{Eq. S10}$$

The mass concentration of  $\text{NO}_3$  is extracted from the whole:

$$c_{\text{CPC}} \left( \frac{\mu\text{g NO}_3}{\text{m}^3 \text{ air}} \right) = c_{\text{CPC}} \left( \frac{\mu\text{g PM}}{\text{m}^3 \text{ air}} \right) \times \frac{62 \mu\text{g NO}_3}{80 \mu\text{g PM}} \quad \text{Eq. S11}$$

Thus, the calculation for 300 nm particles is:

$$c_{\text{CPC}} \left( \frac{\mu\text{g NO}_3}{\text{m}^3 \text{ air}} \right) = c_{\text{CPC}} (\text{cm}^{-3}) \times \frac{\pi}{6} (300 \text{ nm})^3 \times 10^{-9} \times 1.72 \times \frac{62}{80} \quad \text{Eq. S12}$$

Mass concentration is then converted to a rate of molecules per second:

$$c_{\text{CPC}} \left( \frac{\text{molec NO}_3}{\text{s}} \right) = c_{\text{CPC}} \left( \frac{\mu\text{g NO}_3}{\text{m}^3 \text{ air}} \right) \left( \frac{10^{-6} \text{ g}}{\mu\text{g}} \right) \left( \frac{1 \text{ mol}}{M_w \text{ g}} \right) \left( N_A \frac{\text{molec}}{\text{mol}} \right) \left( Q \frac{\text{cm}^3}{\text{s}} \right) \left( 10^{-6} \frac{\text{m}^3}{\text{cm}^3} \right) \quad \text{Eq. S13}$$

where  $N_A = 6.02214076 \times 10^{23}$  is Avogadro's number and  $Q$  is the flow rate into the AMS.

**Table S7.** Ammonium nitration ionization efficiency calibration.<sup>a</sup>

| Measured, CPC                                                                           | Eq S3.2                                                                       | Eq S3.5                                                            | Measured, AMS                                                           |
|-----------------------------------------------------------------------------------------|-------------------------------------------------------------------------------|--------------------------------------------------------------------|-------------------------------------------------------------------------|
| $c_{\text{CPC}} \left( \frac{\# \text{ of particles}}{\text{cm}^3 \text{ air}} \right)$ | $c_{\text{CPC}} \left( \frac{\mu\text{g PM}}{\text{m}^3 \text{ air}} \right)$ | $c_{\text{CPC}} \left( \frac{\text{molec NO}_3}{\text{s}} \right)$ | $\text{mz30} + \text{mz46} \left( \frac{\text{ions}}{\text{s}} \right)$ |
| 812.0                                                                                   | 15.30201295                                                                   | 1.65e11                                                            | 25499.3                                                                 |
| 593.7                                                                                   | 11.18818361                                                                   | 1.20e11                                                            | 18873.0                                                                 |
| 366.0                                                                                   | 6.897212733                                                                   | 7.43e10                                                            | 11658.7                                                                 |
| 154.0                                                                                   | 2.902105904                                                                   | 3.12e10                                                            | 4607.13                                                                 |
| 16.2                                                                                    | 0.3052864652                                                                  | 3.29e9                                                             | 407.658                                                                 |
| $\text{IE}_{\text{NO}_3}$ is $1.56077 \times 10^{-7}$ with an $R^2$ of 0.999766         |                                                                               |                                                                    |                                                                         |

<sup>a</sup> The ammonium nitrate calibration took place on Feb. 17, 2022.  $Q$  was  $1.108 \text{ cm}^3 \text{ s}^{-1}$ .

A line is fit showing measured AMS signal as a function of molecules per second measured by the CPC. The slope of this line,  $1.56077 \times 10^{-7}$ , was taken to be  $\text{IE}_{\text{NO}_3}$ , and the regression  $R^2$  value was 0.999766.

## S4.2. Chloride

Table S8 shows the results of the chloride calibration. In this case, experiments were averaged and one value each of  $c_{\text{CPC}}$  and  $c_{\text{AMS}}$  were used (rather than fitting a line, as with ammonium nitrate). The chloride ionization efficiency is quantified using the sum of the high-resolution ions,  $^{35}\text{Cl}^+$ ,  $\text{H}^{35}\text{Cl}^+$ ,  $^{37}\text{Cl}^+$ ,  $\text{H}^{37}\text{Cl}^+$ , and  $\text{Na}^{35}\text{Cl}^+$ , corresponding to ions at  $m/z$  35, 36, 37, 38, and 58.

Based on the HTDMA CPC signal, the concentration of particles passed to the AMS is  $c_{\text{CPC}} = 4.97 \mu\text{g m}^{-3}$  (averaged over two runs) of sea salt, assuming a density of  $2.16 \text{ g cm}^{-3}$  (Eq S3.1,2). This is not the inverted total concentration, but rather the raw count, which is subsequently re-routed to the AMS in the modified setup (Figure 1, path D-2). The HTDMA and AMS experiments were done sequentially with the same sample on the same day. The

mass ratio of Cl to all ions in the dry sea salt is 0.53628028, thus the mass concentration of Cl is  $2.67 \mu\text{g m}^{-3}$ .

Mass concentration is converted to molecules per second via:

$$c_{\text{CPC}} \left( \frac{\text{molec Cl}}{\text{s}} \right) = c_{\text{CPC}} \left( \frac{\mu\text{g Cl}}{\text{m}^3} \right) \left( \frac{10^{-6} \text{ g}}{\mu\text{g}} \right) \left( \frac{1 \text{ mol}}{M_w \text{ g}} \right) \left( N_A \frac{\text{molec}}{\text{mol}} \right) \left( \frac{10^{-6} \text{ m}^3}{\text{cm}^3} \right) \left( Q \frac{\text{cm}^3}{\text{s}} \right) \quad \text{Eq. S14}$$

using the molar mass of Cl,  $M_w = 34.96885 \text{ g mol}^{-1}$  and a flow rate  $Q = 1.6347292 \text{ cm}^3 \text{ s}^{-1}$  on April 26, 2022. The result is  $7.5 \times 10^{10}$  molecules per second. Applying a collection efficiency, CE, of 0.25 (typical of a dry salt aerosol) (Ovadnevaite et al.<sup>5</sup>), the value is reduced to  $\text{CE} \times c_{\text{CPC}} = 1.9 \times 10^{10}$  molecules per second. This value is directly compared to the average AMS signal (ions/s) to obtain the ionization efficiency:

$$\text{IE}_{\text{Cl}} = \frac{(\text{CE}) \left( I \frac{\text{ions Cl}}{\text{s}} \right)}{\left( c_{\text{CPC}} \frac{\text{molec Cl}}{\text{s}} \right)} \quad \text{Eq. S15}$$

Results are printed in Table S8 and in the main text. The relative ionization efficiency is obtained via:

$$\text{RIE}_{\text{Cl}} = \frac{\text{IE}_{\text{Cl}} M_{w,\text{NO}_3}}{\text{IE}_{\text{NO}_3} M_{w,\text{Cl}}} \quad \text{Eq. S16}$$

**Table S8.** Chloride ionization efficiency calibration using sea salt.<sup>a</sup>

| m/z                                              | 35                | 36                  | 37                | 38                  | 58                   | SUM                     |
|--------------------------------------------------|-------------------|---------------------|-------------------|---------------------|----------------------|-------------------------|
| m/z HR (g/mol)                                   | 34.96885          | 35.97668            | 36.9659           | 37.97373            | 57.95862             |                         |
| Ion ID                                           | <sup>35</sup> Cl+ | H <sup>35</sup> Cl+ | <sup>37</sup> Cl+ | H <sup>37</sup> Cl+ | Na <sup>35</sup> Cl+ |                         |
| <b>c<sub>CPC</sub> (μg PM m<sup>-3</sup>)</b>    |                   |                     |                   |                     |                      | 4.97                    |
| <b>c<sub>CPC</sub> (μg Cl m<sup>-3</sup>)</b>    |                   |                     |                   |                     |                      | 2.67                    |
| <b>c<sub>CPC</sub> (molec Cl s<sup>-1</sup>)</b> |                   |                     |                   |                     |                      | $7.5035 \times 10^{10}$ |
| <b>Exp 1 (ions s<sup>-1</sup>)<sup>b</sup></b>   | 137.701           | 228.907             | 50.8788           | 77.7011             | 29.3237              | 524.5116                |
| <b>Exp 2 (ions s<sup>-1</sup>)</b>               | 185.389           | 299.257             | 53.6422           | 83.5137             | 37.673               | 659.4749                |
| <b>Average (ions s<sup>-1</sup>)</b>             | <b>AVG:</b>       |                     |                   |                     |                      | 591.9932                |
| <b>Collection Efficiency<sup>c</sup></b>         |                   |                     |                   |                     |                      | 0.25                    |
| <b>Ionization Efficiency of Cl (ion / molec)</b> |                   |                     |                   |                     |                      | $3.1558 \times 10^{-8}$ |
| <b>RIE of Cl</b>                                 |                   |                     |                   |                     |                      | 0.3584                  |

<sup>a</sup> The experiments took place on April 26, 2022.  $Q$  was  $1.6347292 \text{ cm}^3 \text{ s}^{-1}$ . <sup>b</sup> Exp 1 and Exp 2 are two separate HTDMA scans on the same day. <sup>c</sup> Value for dry salt<sup>5</sup>

### S4.3. Polystyrene

Table S9 shows the polystyrene ionization efficiency calculation, which followed a similar method as described for chloride. The collection efficiency of the salt-coated PSL was assumed to be 0.25, similar to chloride and appropriate for salts in the AMS.<sup>5</sup>

**Table S9.** Polystyrene ionization efficiency calibration.<sup>a</sup>

|                                                                                      |         |          |                                            |                         |
|--------------------------------------------------------------------------------------|---------|----------|--------------------------------------------|-------------------------|
| <b>m/z</b>                                                                           | 78      | 103      | 104                                        | SUM                     |
| <b>m/z HR (g/mol)</b>                                                                | 78.0514 | 103.0591 | 104.0649                                   |                         |
| <b>Ion ID</b>                                                                        |         |          | C <sub>8</sub> H <sub>8</sub> <sup>+</sup> |                         |
| <b>c<sub>CPC</sub> (μg PS m<sup>-3</sup>)</b>                                        |         |          |                                            | 0.0233785               |
| <b>c<sub>CPC</sub> (molec C<sub>8</sub>H<sub>8</sub> s<sup>-1</sup>)<sup>b</sup></b> |         |          |                                            | 2.2116×10 <sup>8</sup>  |
| <b>Exp 1 (ions s<sup>-1</sup>)<sup>c</sup></b>                                       | 23.8567 | 13.0868  | 13.1677                                    | 43.8104 <sup>d</sup>    |
| <b>Exp 2 (ions s<sup>-1</sup>)</b>                                                   | 19.7181 | 12.1157  | 17.3222                                    | 41.6820 <sup>d</sup>    |
| <b>Average (ions s<sup>-1</sup>)</b>                                                 |         |          | <b>AVG:</b>                                | 42.7462                 |
| <b>Collection Efficiency</b>                                                         |         |          |                                            | 0.25                    |
| <b>Ionization Efficiency of PS (ion / molec)</b>                                     |         |          |                                            | 4.9669×10 <sup>-8</sup> |
| <b>RIE of PS</b>                                                                     |         |          |                                            | 0.1896                  |

<sup>a</sup>The experiments took place on April 26, 2022.  $Q$  was 1.6347292 cm<sup>3</sup> s<sup>-1</sup>. <sup>b</sup>After converting the observed mass into the equivalent concentration of styrene monomers. <sup>c</sup>Exp 1 and Exp 2 are two separate HTDMA scans on the same day. <sup>d</sup>Equal to the peak of the combined timeseries.

## Section S5. Supplement to the Results

### S5.1. Enhancement of Separation After Hygroscopic Growth

Figure S4 shows the size distribution ( $dN/dD$ , cm<sup>-3</sup>) measured by the DMA 1 (Figure 1, route A, B-1) juxtaposed with the size distribution measured by DMA 2 (the HTDMA, Figure 1 route A, B, C, D-1;  $dN/dD$ , cm<sup>-3</sup>). The comparison in panel A illustrates the detection of polystyrene latex spheres in the dry size distribution. The comparison in panel B illustrates that the polystyrene latex spheres are no longer detected in the dry size distribution, but maybe detected after humidified separation in the HTDMA.

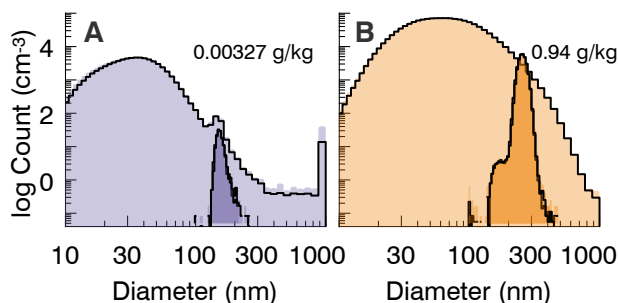

**Figure S4.** The entire particle distribution with the HTDMA-selected growth factors overlaid, showing the ability of the HTDMA to separate the salt and PSL peaks even at higher concentrations of total particles. Particles were generated by the atomizer. Panel A shows solution #2 (see Table 1), experiments #13, 14, 31, and 32 (see Table S1). Panel B shows solution #5, experiments #6, 7, 8, 25, and 26. Note that the size distributions are not inverted and have units of particles per cm<sup>3</sup>.



## S5.2. Growth Factors

Table S10 lists the hygroscopic growth factors displayed in the main text, Figure 5 and Figure 6. The table is broken into two figures to separate the atomizer from the ÆGOR experiments.

**Table S10.** Measured growth factors and the hygroscopicity of sea salt.

| (A) Experiments using the atomizer |                   |                   |       |                       | (B) Experiments using ÆGOR sea spray tank |      |      |                 |                       |
|------------------------------------|-------------------|-------------------|-------|-----------------------|-------------------------------------------|------|------|-----------------|-----------------------|
| Salinity<br>g kg <sup>-1</sup>     | GF 1 <sup>a</sup> | GF 2 <sup>b</sup> | $a_w$ | $\kappa$ <sup>c</sup> | Salinity<br>g kg <sup>-1</sup>            | GF 1 | GF 2 | $a_w$           | $\kappa$              |
| NaN                                | NaN               | NaN               | 74.9  |                       | 0                                         | 1.01 | 1.25 | 74.9            |                       |
| 0                                  | 1.02              | 1.34              | 74.9  |                       | 0                                         | 1.02 | 1.27 | 75.1            |                       |
| 0                                  | 1.00              | NaN               | 74.9  |                       | 0.01                                      | NaN  | NaN  | 74.7            |                       |
| 0.0001                             | 1.02              | NaN               | 74.9  |                       | 0.01                                      | 1.04 | 1.3  | 74.9            |                       |
| 0.0005                             | 1.02              | NaN               | 74.9  |                       | 0.0215                                    | NaN  | NaN  | 75.0            |                       |
| 0.0033                             | 1.04              | 1.33              | 74.9  |                       | 0.0464                                    | NaN  | NaN  | 75.1            |                       |
| 0.022                              | 1.05              | 1.67              | 72.2  |                       | 0.0464                                    | 1.02 | 1.63 | 75.0            |                       |
| 0.14                               | 1.08              | 1.72              | 74.4  | 1.40752               | 0.1                                       | NaN  | NaN  | 74.9            |                       |
| 0.151                              | 1.08              | 1.72              | 74.4  | 1.40752               | 0.2154                                    | 1.07 | 1.73 | 74.8            | 1.40747               |
| 0.239                              | 1.09              | 1.72              | 74.4  | 1.40752               | 0.2154                                    | 1.07 | 1.77 | 76.35           | 1.40792               |
| 0.378                              | NaN               | NaN               | 74.9  |                       | 0.464                                     | 1.1  | 1.78 | 76.72           | 1.40789               |
| 0.596                              | 1.16              | 1.72              | 74.4  | 1.40752               | 0.464                                     | 1.12 | 1.77 | 76.35           | 1.40792               |
| 0.94                               | 1.34              | 1.72              | 74.4  | 1.40752               | 0.464                                     | 1.1  | 1.76 | 75.98           | 1.40737               |
| 6.21                               | 1.70              | NaN               | 74.9  |                       | 1                                         | 1.14 | 1.77 | 76.35           | 1.40792               |
| 41                                 | 1.85              | 1.7               | 73.5  | 1.40799               | 1                                         | 1.1  | 1.79 | 77.08           | 1.40807               |
|                                    |                   | <b>Avg:</b>       |       | 1.408                 | 1                                         | 1.13 | 1.77 | 76.35           | 1.40792               |
|                                    |                   | <b>Std Dev:</b>   |       | 1.48×10 <sup>-4</sup> |                                           |      |      | <b>Avg:</b>     | 1.41                  |
|                                    |                   |                   |       |                       |                                           |      |      | <b>Std Dev:</b> | 2.50×10 <sup>-4</sup> |

<sup>a</sup> GF 1 is the growth factor of plastic. The dry diameter was 147 nm and dry size selection occurs at 150 nm for all experiments. <sup>b</sup> GF 2 is the growth factor of the salt mode. <sup>c</sup>  $\kappa$  is the hygroscopicity parameter of the salt (based on GF 2). Values are reported for salinity > 0.1 g kg<sup>-1</sup>, where the contribution from plastics can be ignored.  $\kappa = (GF^3 - 1)(1 - a_w)/a_w$ .

## References

- ‡ D. Sueper and collaborators, ToF-AMS Data Analysis Software Webpage, [http://cires1.colorado.edu/jimenez-group/wiki/index.php/ToF-AMS\\_Analysis\\_Software](http://cires1.colorado.edu/jimenez-group/wiki/index.php/ToF-AMS_Analysis_Software).
- Corbin, C., A. Othman, J. D. Allan, D. R. Worsnop, J. D. Haskins, B. Sierau, U. Lohmann and A. A. Mensah, Peak-fitting and integration imprecision in the Aerodyne aerosol mass spectrometer: effects of mass accuracy on location-constrained fits, *Atmos. Meas. Tech.*, 2015, 8, 4615–4636.
- Hasager, F., Þ. N. Björgvinsdóttir, S. F. Vinter, A. Christofili, E. R. Kjærgaard, S. S. Petters, M. Bilde and M. Glasius, Development and validation of an analytical pyrolysis method for detection of airborne polystyrene nanoparticles.
- Nicholas, C. P. and R. C. Yates, The Probability Integral, *The American Mathematical Monthly*, 1950, 57, 412–413.
- Ovadnevaite, J., D. Ceburnis, M. Canagaratna, H. Berresheim, J. Bialek, G. Martucci, D. R. Worsnop and C. O'Dowd, On the effect of wind speed on submicron sea salt mass concentrations and source fluxes, *Journal of Geophysical Research: Atmospheres*, DOI:10.1029/2011JD017379.

Petters, M. D.: Revisiting matrix-based inversion of scanning mobility particle sizer (SMPS) and humidified tandem differential mobility analyzer (HTDMA) data, *Atmos. Meas. Tech.*, 14, 7909–7928, <https://doi.org/10.5194/amt-14-7909-2021>, 2021.

Weisstein, E. W., Gaussian Integral. From MathWorld--A Wolfram Web Resource. <https://mathworld.wolfram.com/GaussianIntegral.html>. Accessed January 2023.

Williams, Leah, 2010, What is My Vaporizer Temperature?, [https://cires1.colorado.edu/jimenez-group/UsrMtgs/UsersMtg11/WilliamsAMSUsersMtg\\_2010\\_VapT.pdf](https://cires1.colorado.edu/jimenez-group/UsrMtgs/UsersMtg11/WilliamsAMSUsersMtg_2010_VapT.pdf). Hyytiälä, Finland, 2010. Accessed January 2023.
